# Supplementary material for: Azasiline-based thermally activated delayed fluorescence emitters for blue organic light emitting diodes
Source: Royal Society of Chemistry journal article supplement (doi:10.1039/c6tc04653c), 2016-12-05
Supplement: c6tc04653c1.pdf [file c6tc04653c1.pdf]

## Supporting Information

### **Azasiline-Based Thermally Activated Delayed Fluorescence Emitters for Blue Organic Light Emitting Diodes**

Jin Won Sun<sup>a</sup>, Jang Yeol Baek<sup>b</sup>, Kwon-Hyeon Kim<sup>a</sup>, Jin-Suk Huh<sup>a</sup>, Soon-Ki Kwon<sup>b\*</sup>, Yun-Hi Kim<sup>c\*</sup> and Jang-Joo Kim<sup>a\*</sup>

<sup>a</sup> *Department of Materials Science and Engineering, Research Institute of Advanced Materials, Seoul National University, Seoul, 151-744, South Korea*

<sup>b</sup> *Department of Materials Engineering and Convergence Technology and ERI, Gyeongsang National University, Jinju 660-701, South Korea*

<sup>c</sup> *Department of Chemistry and Research Institute for Green Energy Convergence Technology (RIGET), Gyeongsang National University, Jinju 660-701, South Korea*

## 1. DFT Calculation

**Table S1. DFT Geometry of DTPPDDA**

|     |          |          |          |
|-----|----------|----------|----------|
| Si  | -6.73461 | 0.052267 | -0.05573 |
| N1  | 7.021699 | -1.16331 | -0.03585 |
| N2  | 8.99982  | 0.144036 | -0.06995 |
| N3  | 6.881423 | 1.203462 | 0.050663 |
| N4  | -3.71138 | -0.62441 | 0.392394 |
| C1  | 0.544733 | -0.3747  | 0.248398 |
| C2  | -0.08906 | -1.42846 | 0.930666 |
| C3  | -1.47785 | -1.5189  | 0.983724 |
| C4  | -2.27265 | -0.55332 | 0.355547 |
| C5  | -1.65654 | 0.499668 | -0.32508 |
| C6  | -0.26709 | 0.586172 | -0.37795 |
| C7  | 2.024252 | -0.28231 | 0.192012 |
| C8  | 2.81947  | -1.43828 | 0.095907 |
| C9  | 4.205545 | -1.35521 | 0.044829 |
| C10 | 4.848021 | -0.10822 | 0.086012 |
| C11 | 4.062249 | 1.050626 | 0.180416 |
| C12 | 2.676333 | 0.963125 | 0.233557 |
| C13 | 6.325782 | -0.01788 | 0.030737 |
| C14 | 8.356627 | -1.03366 | -0.08373 |
| C15 | 8.222158 | 1.235691 | -0.00216 |
| C16 | 9.172433 | -2.27013 | -0.15519 |
| C17 | 8.886547 | 2.561546 | 0.014996 |
| C18 | 8.553338 | -3.53003 | -0.16463 |
| C19 | 9.320832 | -4.69012 | -0.23058 |
| C20 | 10.71425 | -4.60755 | -0.2883  |
| C21 | 11.33736 | -3.35713 | -0.2795  |
| C22 | 10.57301 | -2.19494 | -0.21329 |
| C23 | 10.2864  | 2.654765 | -0.03382 |
| C24 | 10.90891 | 3.900353 | -0.01831 |
| C25 | 10.14303 | 5.06704  | 0.045843 |
| C26 | 8.749399 | 4.982023 | 0.094721 |
| C27 | 8.123496 | 3.738102 | 0.079504 |
| C28 | -3.60851 | 0.274346 | 2.662249 |
| C29 | -4.21007 | 0.823153 | 3.789151 |
| C30 | -5.58157 | 1.079871 | 3.816425 |

|     |          |          |          |
|-----|----------|----------|----------|
| C31 | -6.32836 | 0.800197 | 2.676782 |
| C32 | -5.74999 | 0.271763 | 1.508827 |
| C33 | -4.36429 | -0.03092 | 1.509269 |
| C34 | -4.34882 | -1.38007 | -0.63172 |
| C35 | -3.58084 | -2.28933 | -1.39164 |
| C36 | -4.16667 | -3.06989 | -2.38184 |
| C37 | -5.53431 | -2.98475 | -2.64653 |
| C38 | -6.29344 | -2.0791  | -1.91293 |
| C39 | -5.73073 | -1.2527  | -0.92398 |
| C40 | -6.76934 | 1.658002 | -1.06255 |
| C41 | -8.50353 | -0.51398 | 0.28739  |
| C42 | -6.83301 | 2.912479 | -0.42769 |
| C43 | -6.88272 | 4.096858 | -1.16468 |
| C44 | -6.86593 | 4.052547 | -2.56005 |
| C45 | -6.79578 | 2.820132 | -3.21194 |
| C46 | -6.746   | 1.638876 | -2.46944 |
| C47 | -8.73877 | -1.66685 | 1.062518 |
| C48 | -10.0345 | -2.10844 | 1.328518 |
| C49 | -11.1301 | -1.40419 | 0.822553 |
| C50 | -10.9216 | -0.25988 | 0.052446 |
| C51 | -9.62147 | 0.178548 | -0.21056 |
| H1  | 0.512265 | -2.171   | 1.44705  |
| H2  | -1.95519 | -2.33377 | 1.520434 |
| H3  | -2.27522 | 1.242197 | -0.82017 |
| H4  | 0.19382  | 1.396136 | -0.93557 |
| H5  | 2.342412 | -2.41208 | 0.033048 |
| H6  | 4.807675 | -2.25282 | -0.03728 |
| H7  | 4.554247 | 2.015657 | 0.221442 |
| H8  | 2.089531 | 1.871422 | 0.335985 |
| H9  | 7.471596 | -3.58226 | -0.11936 |
| H10 | 8.832005 | -5.66059 | -0.23706 |
| H11 | 11.31205 | -5.5138  | -0.33982 |
| H12 | 12.42089 | -3.28818 | -0.3242  |
| H13 | 11.0457  | -1.21951 | -0.20551 |
| H14 | 10.87036 | 1.742934 | -0.08351 |
| H15 | 11.99314 | 3.962026 | -0.05632 |
| H16 | 10.63025 | 6.038524 | 0.057763 |
| H17 | 8.149913 | 5.886973 | 0.144614 |
| H18 | 7.042979 | 3.660021 | 0.116556 |

|     |          |          |          |
|-----|----------|----------|----------|
| H19 | -2.5454  | 0.073889 | 2.687211 |
| H20 | -3.59482 | 1.038382 | 4.659304 |
| H21 | -6.05333 | 1.495048 | 4.702404 |
| H22 | -7.39795 | 1.000388 | 2.681423 |
| H23 | -2.52047 | -2.39811 | -1.20459 |
| H24 | -3.54227 | -3.76189 | -2.94154 |
| H25 | -5.99377 | -3.60504 | -3.41073 |
| H26 | -7.36049 | -1.99843 | -2.11082 |
| H27 | -6.83232 | 2.968046 | 0.658709 |
| H28 | -6.92977 | 5.053653 | -0.65035 |
| H29 | -6.90191 | 4.973847 | -3.13612 |
| H30 | -6.77486 | 2.778597 | -4.29824 |
| H31 | -6.67643 | 0.689005 | -2.99488 |
| H32 | -7.89792 | -2.22731 | 1.465824 |
| H33 | -10.1909 | -3.00065 | 1.929782 |
| H34 | -12.1409 | -1.74697 | 1.028952 |
| H35 | -11.77   | 0.292733 | -0.34375 |
| H36 | -9.47577 | 1.073044 | -0.81074 |

**Table S2. DFT Geometry of BDAPM**

|     |          |          |          |
|-----|----------|----------|----------|
| Si1 | -7.7094  | 0.728404 | -0.01854 |
| Si2 | 7.769965 | 0.673088 | 0.014688 |
| O   | 0.086623 | -4.64758 | -0.34654 |
| N1  | -5.36186 | -1.3225  | 0.180392 |
| N2  | 4.8221   | -0.39333 | 0.294127 |
| C1  | -0.02875 | -3.44379 | -0.14744 |
| C2  | 1.199502 | -2.58885 | -0.02914 |
| C3  | 1.256531 | -1.43409 | 0.767112 |
| C4  | 2.445839 | -0.71682 | 0.885738 |
| C5  | 3.591191 | -1.13491 | 0.199073 |
| C6  | 3.543816 | -2.29049 | -0.58811 |
| C7  | 2.361856 | -3.01742 | -0.68898 |
| C8  | -2.98762 | -1.02512 | -0.31885 |
| C9  | -1.68208 | -1.51066 | -0.38593 |
| C10 | -1.39655 | -2.83693 | -0.02887 |
| C11 | -2.44954 | -3.6714  | 0.380665 |
| C12 | -3.74931 | -3.18402 | 0.46226  |

|     |          |          |          |
|-----|----------|----------|----------|
| C13 | -4.02541 | -1.85406 | 0.113754 |
| C14 | -5.09966 | -1.14918 | 2.604397 |
| C15 | -5.50476 | -0.67468 | 3.847165 |
| C16 | -6.6138  | 0.163776 | 3.96678  |
| C17 | -7.28926 | 0.536407 | 2.809035 |
| C18 | -6.89099 | 0.100321 | 1.532958 |
| C19 | -5.79173 | -0.78876 | 1.428433 |
| C20 | -6.17039 | -1.45402 | -0.985   |
| C21 | -5.81923 | -2.41633 | -1.95564 |
| C22 | -6.59408 | -2.59775 | -3.09585 |
| C23 | -7.7476  | -1.84071 | -3.30538 |
| C24 | -8.09131 | -0.8815  | -2.35819 |
| C25 | -7.31593 | -0.64931 | -1.20814 |
| C26 | -6.91588 | 2.353876 | -0.5838  |
| C27 | -9.56813 | 0.971582 | 0.204216 |
| C28 | -6.4713  | 3.308677 | 0.349826 |
| C29 | -5.91066 | 4.519078 | -0.06141 |
| C30 | -5.77755 | 4.800342 | -1.42246 |
| C31 | -6.20403 | 3.865068 | -2.36704 |
| C32 | -6.76427 | 2.656266 | -1.9498  |
| C33 | -10.3722 | -0.10151 | 0.6367   |
| C34 | -11.7482 | 0.04765  | 0.806602 |
| C35 | -12.3542 | 1.279438 | 0.546388 |
| C36 | -11.578  | 2.356425 | 0.1178   |
| C37 | -10.1998 | 2.201817 | -0.05054 |
| C38 | 5.203784 | -1.54135 | 2.416557 |
| C39 | 6.00356  | -1.86767 | 3.505843 |
| C40 | 7.309768 | -1.38732 | 3.605089 |
| C41 | 7.801032 | -0.59563 | 2.572662 |
| C42 | 7.032121 | -0.26793 | 1.441176 |
| C43 | 5.691014 | -0.72393 | 1.372684 |
| C44 | 4.989574 | 0.692612 | -0.61143 |
| C45 | 3.875223 | 1.145715 | -1.35205 |
| C46 | 3.981998 | 2.22386  | -2.22333 |
| C47 | 5.192984 | 2.897736 | -2.38444 |
| C48 | 6.298537 | 2.444545 | -1.67276 |
| C49 | 6.236637 | 1.339186 | -0.80526 |
| C50 | 8.713739 | -0.48339 | -1.15341 |
| C51 | 8.919055 | 2.054268 | 0.59741  |

|     |          |          |          |
|-----|----------|----------|----------|
| C52 | 9.420132 | -1.59684 | -0.66156 |
| C53 | 10.13742 | -2.43598 | -1.51578 |
| C54 | 10.16202 | -2.18032 | -2.88802 |
| C55 | 9.463131 | -1.08578 | -3.40012 |
| C56 | 8.746576 | -0.25067 | -2.54102 |
| C57 | 8.470277 | 2.987537 | 1.552512 |
| C58 | 9.291446 | 4.025354 | 1.99183  |
| C59 | 10.58634 | 4.154259 | 1.482827 |
| C60 | 11.05263 | 3.241494 | 0.536538 |
| C61 | 10.22608 | 2.202871 | 0.100691 |
| H1  | 0.379318 | -1.10641 | 1.315532 |
| H2  | 2.495242 | 0.170409 | 1.509935 |
| H3  | 4.439996 | -2.60985 | -1.11132 |
| H4  | 2.317916 | -3.92665 | -1.27958 |
| H5  | -3.21314 | -0.00227 | -0.60454 |
| H6  | -0.89045 | -0.85999 | -0.74256 |
| H7  | -2.22668 | -4.70429 | 0.627476 |
| H8  | -4.56152 | -3.82661 | 0.789421 |
| H9  | -4.24662 | -1.81365 | 2.555469 |
| H10 | -4.95047 | -0.97963 | 4.73131  |
| H11 | -6.93824 | 0.522458 | 4.939345 |
| H12 | -8.15316 | 1.193429 | 2.886812 |
| H13 | -4.94316 | -3.03719 | -1.81843 |
| H14 | -6.29484 | -3.35244 | -3.81882 |
| H15 | -8.35999 | -1.99263 | -4.18951 |
| H16 | -8.98715 | -0.28289 | -2.51031 |
| H17 | -6.55289 | 3.101065 | 1.414515 |
| H18 | -5.57373 | 5.239916 | 0.67955  |
| H19 | -5.33902 | 5.741312 | -1.7452  |
| H20 | -6.09672 | 4.074788 | -3.42848 |
| H21 | -7.07796 | 1.933886 | -2.70008 |
| H22 | -9.91679 | -1.06764 | 0.843706 |
| H23 | -12.3482 | -0.79486 | 1.141373 |
| H24 | -13.4269 | 1.397705 | 0.677975 |
| H25 | -12.044  | 3.317389 | -0.08571 |
| H26 | -9.60874 | 3.050856 | -0.38434 |
| H27 | 4.191024 | -1.92105 | 2.387949 |
| H28 | 5.589235 | -2.4964  | 4.289962 |
| H29 | 7.929739 | -1.63046 | 4.463128 |

|     |          |          |          |
|-----|----------|----------|----------|
| H30 | 8.818958 | -0.21599 | 2.635361 |
| H31 | 2.912803 | 0.663304 | -1.24431 |
| H32 | 3.099133 | 2.544148 | -2.77096 |
| H33 | 5.272575 | 3.74986  | -3.0532  |
| H34 | 7.250837 | 2.957874 | -1.79083 |
| H35 | 9.401687 | -1.82092 | 0.402632 |
| H36 | 10.67293 | -3.29136 | -1.11122 |
| H37 | 10.71805 | -2.83405 | -3.55535 |
| H38 | 9.471219 | -0.88539 | -4.46873 |
| H39 | 8.195499 | 0.587932 | -2.96079 |
| H40 | 7.465325 | 2.900622 | 1.96017  |
| H41 | 8.923541 | 4.733357 | 2.730331 |
| H42 | 11.22808 | 4.96272  | 1.824148 |
| H43 | 12.05971 | 3.335876 | 0.137942 |
| H44 | 10.60472 | 1.498008 | -0.63512 |

**Table S3. DFT Geometry of SPDDA**

|     |          |          |          |
|-----|----------|----------|----------|
| S   | 0.000044 | 4.308424 | -5.3E-05 |
| Si1 | 7.262044 | -1.0304  | 0.005511 |
| Si2 | -7.26207 | -1.03038 | -0.00545 |
| O1  | 0.200832 | 5.022138 | 1.271021 |
| O2  | -0.20079 | 5.022166 | -1.27111 |
| N1  | 4.754059 | 0.685915 | -0.7242  |
| N2  | -4.75398 | 0.685908 | 0.724012 |
| C1  | -1.41224 | 3.208855 | 0.222862 |
| C2  | -2.16962 | 2.834218 | -0.88775 |
| C3  | -3.26955 | 1.996503 | -0.70798 |
| C4  | -3.60824 | 1.542029 | 0.570535 |
| C5  | -2.84347 | 1.934632 | 1.677121 |
| C6  | -1.74239 | 2.771889 | 1.50753  |
| C7  | 3.269756 | 1.996655 | 0.707788 |
| C8  | 2.169831 | 2.834372 | 0.887583 |
| C9  | 1.412378 | 3.208944 | -0.22301 |
| C10 | 1.74246  | 2.771919 | -1.50767 |
| C11 | 2.843534 | 1.934657 | -1.67728 |
| C12 | 3.608365 | 1.5421   | -0.57072 |
| C13 | 6.015966 | 2.644648 | -1.46573 |

|     |          |          |          |
|-----|----------|----------|----------|
| C14 | 7.212928 | 3.288703 | -1.76015 |
| C15 | 8.435451 | 2.635431 | -1.5998  |
| C16 | 8.430836 | 1.332406 | -1.11269 |
| C17 | 7.242552 | 0.659959 | -0.77654 |
| C18 | 6.004921 | 1.317802 | -0.98582 |
| C19 | 4.525481 | -0.71997 | -0.698   |
| C20 | 3.219252 | -1.20753 | -0.91629 |
| C21 | 2.957728 | -2.5734  | -0.92849 |
| C22 | 3.982758 | -3.50016 | -0.73534 |
| C23 | 5.269405 | -3.02464 | -0.50289 |
| C24 | 5.566278 | -1.65119 | -0.45442 |
| C25 | 7.443278 | -0.89878 | 1.887016 |
| C26 | 8.634356 | -2.12486 | -0.68939 |
| C27 | 8.195952 | 0.134371 | 2.475707 |
| C28 | 8.354187 | 0.21804  | 3.860272 |
| C29 | 7.75655  | -0.73201 | 4.690326 |
| C30 | 6.99878  | -1.76184 | 4.129416 |
| C31 | 6.84417  | -1.84052 | 2.744361 |
| C32 | 8.692668 | -2.39286 | -2.07141 |
| C33 | 9.697487 | -3.1951  | -2.61104 |
| C34 | 10.67143 | -3.7497  | -1.77663 |
| C35 | 10.63381 | -3.49784 | -0.40503 |
| C36 | 9.624859 | -2.6937  | 0.130633 |
| C37 | -3.21926 | -1.20756 | 0.916266 |
| C38 | -2.95778 | -2.57344 | 0.928594 |
| C39 | -3.98285 | -3.50019 | 0.735568 |
| C40 | -5.26949 | -3.02464 | 0.503092 |
| C41 | -5.56631 | -1.65119 | 0.454487 |
| C42 | -4.52548 | -0.71998 | 0.697962 |
| C43 | -6.00481 | 1.317892 | 0.985537 |
| C44 | -6.0158  | 2.644828 | 1.465213 |
| C45 | -7.21273 | 3.288978 | 1.759547 |
| C46 | -8.43528 | 2.635721 | 1.599349 |
| C47 | -8.43072 | 1.332611 | 1.112469 |
| C48 | -7.24247 | 0.66006  | 0.776411 |
| C49 | -8.63446 | -2.12461 | 0.689666 |
| C50 | -7.44335 | -0.89905 | -1.88697 |
| C51 | -8.69336 | -2.39154 | 2.071873 |
| C52 | -9.69817 | -3.19368 | 2.611645 |



|     |          |          |          |
|-----|----------|----------|----------|
| C53 | -10.6715 | -3.74927 | 1.777208 |
| C54 | -10.6333 | -3.49848 | 0.405427 |
| C55 | -9.62438 | -2.69443 | -0.13039 |
| C56 | -6.84357 | -1.84037 | -2.74428 |
| C57 | -6.99825 | -1.76185 | -4.12934 |
| C58 | -7.75677 | -0.73259 | -4.69028 |
| C59 | -8.35509 | 0.217053 | -3.86025 |
| C60 | -8.19679 | 0.133541 | -2.47569 |
| H1  | -1.91317 | 3.214399 | -1.87083 |
| H2  | -3.87964 | 1.69501  | -1.55378 |
| H3  | -3.12435 | 1.587256 | 2.666736 |
| H4  | -1.15893 | 3.104064 | 2.359678 |
| H5  | 3.8799   | 1.695196 | 1.55357  |
| H6  | 1.913428 | 3.21461  | 1.870654 |
| H7  | 1.158959 | 3.104047 | -2.35981 |
| H8  | 3.124343 | 1.587221 | -2.6669  |
| H9  | 5.088517 | 3.180494 | -1.62153 |
| H10 | 7.181235 | 4.309661 | -2.13192 |
| H11 | 9.369039 | 3.134334 | -1.84314 |
| H12 | 9.377194 | 0.81228  | -0.97943 |
| H13 | 2.399896 | -0.52168 | -1.0895  |
| H14 | 1.939769 | -2.91098 | -1.1065  |
| H15 | 3.780571 | -4.56707 | -0.75935 |
| H16 | 6.077554 | -3.73618 | -0.34604 |
| H17 | 8.65765  | 0.891755 | 1.846073 |
| H18 | 8.939482 | 1.026843 | 4.290765 |
| H19 | 7.876195 | -0.66727 | 5.768891 |
| H20 | 6.524599 | -2.50093 | 4.770521 |
| H21 | 6.238494 | -2.64211 | 2.327112 |
| H22 | 7.94232  | -1.96928 | -2.73573 |
| H23 | 9.722178 | -3.38828 | -3.68059 |
| H24 | 11.4557  | -4.37534 | -2.19539 |
| H25 | 11.389   | -3.92685 | 0.248865 |
| H26 | 9.608198 | -2.5068  | 1.201247 |
| H27 | -2.39987 | -0.52173 | 1.089384 |
| H28 | -1.93983 | -2.91104 | 1.106622 |
| H29 | -3.7807  | -4.5671  | 0.759687 |
| H30 | -6.07767 | -3.73617 | 0.346335 |
| H31 | -5.08833 | 3.180674 | 1.620892 |

|     |          |          |          |
|-----|----------|----------|----------|
| H32 | -7.18099 | 4.310005 | 2.131122 |
| H33 | -9.36884 | 3.134697 | 1.842633 |
| H34 | -9.37711 | 0.812492 | 0.979345 |
| H35 | -7.94349 | -1.96715 | 2.736218 |
| H36 | -9.72332 | -3.38602 | 3.681344 |
| H37 | -11.4558 | -4.37484 | 2.196082 |
| H38 | -11.3881 | -3.92825 | -0.2485  |
| H39 | -9.6073  | -2.50833 | -1.20113 |
| H40 | -6.23731 | -2.6415  | -2.327   |
| H41 | -6.52354 | -2.50062 | -4.77042 |
| H42 | -7.87646 | -0.66797 | -5.76885 |
| H43 | -8.94097 | 1.025419 | -4.29077 |
| H44 | -8.65903 | 0.890618 | -1.84608 |

## 2. Materials and methods

All starting materials were purchased from Aldrich, TCI and Alfa Aesar. Pd catalyst was purchased from Umicore. Solvents were purified by distillation using Na or CaH<sub>2</sub>. n-BuLi was used without further purification. <sup>1</sup>H and <sup>13</sup>C-NMR spectra were recorded using a Bruker Avance 300 MHz and Bruker 500 FT-NMR spectrometer; chemical shifts (ppm) were reported with tetramethylsilane as an internal standard. Thermal analysis was performed using a TA TGA 2100 thermogravimetric analyzer under a nitrogen atmosphere at a heating rate of 10 °C/min. Differential scanning calorimeter (DSC) was conducted under nitrogen using a TA instrument 2100 DSC. The sample was heated at 10 °C /min from 50 °C to 400 °C. UV–vis absorption spectra were measured using a Perkin-Elmer LAMBDA-900 UV spectrophotometer.

**Synthesis of 10,10-diphenyl-5,10-dihydrodibenzo[b,e][1,4]azasiline** : The synthesis was prepared following reported literature. (*Chem. Mater.* 2015, 27, 6675–6681.) Yield: 27% (7.5 g). <sup>1</sup>H NMR (300 MHz, CDCl<sub>3</sub>, δ): 9.43 (s, 1H), 7.48-7.32 (m, 14H), 7.10-7.07 (m, 2H), 6.90-6.85 (m, 2H)

**Synthesis of 2,4-diphenyl-6-(4-(4,4,5,5-tetramethyl-1,3,2-dioxaborolan-2-yl)phenyl)-1,3,5-triazine** : 10 g (25.8 mmol) of 2-(4-Bromophenyl)-4,6-diphenyl-1,3,5-triazine, 13.1 g (51.5 mmol) of bispinacolatodiboron, 7.58 g (77.3 mmol) of potassium acetate are suspended in 150 mL of N,N-dimethylformamide. 0.84 g (1.0 mmol) of 1,1-Bis(diphenylphosphino)-ferrocene-dichloropalladium(II) is added to this suspension, and the reaction mixture is heated under reflux for 16 h. After cooling, 300 mL of ethyl acetate and 200 mL of water are added, and the organic phase is separated, washed three times with 200 mL of water, dried with MgSO<sub>4</sub> and subsequently evaporated to dryness. The crude product was purified by silica gel chromatography (hexane–methylenechloride, gradient from 1:1). Yield: 53 % (6 g).

<sup>1</sup>H-NMR (300MHz, CDCl<sub>3</sub>, ppm): 8.83-8.77 (m, 6H), 8.04-8.02 (d, 2H), 7.65-7.58 (m, 6H), 1.42 (s, 12H).

**Synthesis of 5-(4'-(4,6-diphenyl-1,3,5-triazin-2-yl)-[1,1'-biphenyl]-4-yl)-10,10-diphenyl-5,10-dihydrodibenzo[b,e][1,4]azasiline** : A mixture of 2-(4'-bromo-[1,1'-biphenyl]-4-yl)-4,6-diphenyl-1,3,5-triazine (0.5 g, 1.07 mmol), 10,10-diphenyl-5,10-dihydrodibenzo[b,e][1,4] azasiline (0.38 g, 1.07 mmol), sodium-*t*-butoxide (0.31 g, 3.23 mmol), tris(*t*-butyl)phosphine (0.02 g, 0.11 mmol), Pd<sub>2</sub>(dba)<sub>3</sub> (0.05 g, 0.05 mmol), and anhydrous toluene (10 mL) was stirred at 110 °C for 18 h under nitrogen atmosphere. After cooling to room temperature, the mixture was poured into water and then extracted with chloroform. The combined organic phase was washed with brine and dried over MgSO<sub>4</sub>. The crude product was purified by column chromatography (hexane–methylenechloride, gradient from 1:1). Yield: 43 % (0.34 g). T<sub>m</sub>=352 °C. <sup>1</sup>H NMR (300 MHz, CDCl<sub>3</sub>, δ): 8.95-8.92 (d, 2H), 8.86-8.83 (d, 4H), 8.00-7.93 (m, 4H), 7.69-7.63 (m, 12H), 7.46-7.41 (m, 8H), 7.24-7.20 (d, 2H), 7.00-6.96 (t, 2H), 6.58-6.55 (d, 2H) ; <sup>13</sup>C NMR (500 MHz, CDCl<sub>3</sub>, δ): 177.03, 171.74, 164.55, 149.95, 140.06, 136.27, 136.11, 135.99, 135.42, 132.59, 131.89, 130.38, 129.77, 129.64, 129.59, 129.02, 128.70, 127.93, 127.41, 120.03, 117.26, 115.65. HR-Mass: C<sub>51</sub>H<sub>36</sub>N<sub>4</sub>Si calcd. 732.2709, found. 732.2710

**Synthesis of 4,4'-dibromobenzophenone**: The synthesis was prepared following reported literature. [*Trans. Mat. Res. Soc. Japan* 37[3] 459-462 (2012)] Yield: 62% (9 g). <sup>1</sup>H-NMR (300 MHz, CDCl<sub>3</sub>)[ppm] δ = 7.47-7.42 (d, 4H), 7.22-7.18 (d, 4H).

**Synthesis of bis(4-(10,10-diphenyldibenzo[b,e][1,4]azasilin-5(10H)-yl)phenyl)methanone** : A mixture of bis(4-bromophenyl)methanone (0.7 g, 2.06 mmol), 10,10-diphenyl-5,10-dihydrodibenzo[b,e][1,4]azasiline (1.58 g, 4.53 mmol), sodium-*t*-butoxide (0.4 g, 4.12 mmol), tris(*t*-butyl)phosphine (0.04 g, 0.21 mmol), Pd<sub>2</sub>(dba)<sub>3</sub> (0.09 g, 0.10 mmol), and anhydrous toluene (10 mL) was stirred at 110 °C for 18 h under nitrogen atmosphere. After cooling to room temperature, the mixture was poured into water and then extracted with chloroform. The combined organic phase was washed with brine and dried over MgSO<sub>4</sub>. The crude product was purified by column chromatography

(ethyl acetate/n-hexane = 7/1). Yield: 38 % (1.5 g). T<sub>m</sub>=299 °C. <sup>1</sup>H NMR (300 MHz, CDCl<sub>3</sub>, δ): 8.07-8.04 (d, 4H), 7.63-7.60 (m, 12H), 7.43-7.36 (m, 16H), 7.29 (d, 1H), 7.27-7.26 (d, 2H), 7.24(d, 1H), 7.06-7.01 (t, 4H), 6.65-6.62 (d, 4H) ; <sup>13</sup>C NMR (500 MHz, CDCl<sub>3</sub>, δ):194.78, 149.55, 148.19, 136.10, 136.06, 135.59, 134.51, 132.58, 130.41, 129.73, 128.80, 127.94, 121.22, 118.89, 118.80. HR-Mass: C<sub>61</sub>H<sub>44</sub>N<sub>2</sub>OSi<sub>2</sub> calcd. 877.2060, found. 877.3060

**Synthesis of 4,4'-sulfonylbis(bromobenzene)** : The synthesis was prepared following reported literature. *Chem. Mater.* 2015, 27, 6675–6681 Yield: 51% (5 g). <sup>1</sup>H NMR (300 MHz, CDCl<sub>3</sub>, δ): 7.81-7.79 (d, 4H), 7.68-7.65 (d, 4H).

**Synthesis of 5,5'-(sulfonylbis(4,1-phenylene))bis(10,10-diphenyl-5,10-dihydrodibenzo[b,e][1,4]azasiline)** : A mixture of 4,4'-sulfonylbis(bromobenzene) (0.7 g, 1.29 mmol), 10,10-diphenyl-5,10-dihydrodibenzo[b,e][1,4]azasiline (1.43 g, 4.10 mmol), sodium-*t*-butoxide (0.36 g, 3.72 mmol), tris(*t*-butyl)phosphine (0.04 g, 0.19 mmol), Pd<sub>2</sub>(dba)<sub>3</sub> (0.09 g, 0.09 mmol), and anhydrous toluene(10 mL) was stirred at 110 °C for 18 h under nitrogen atmosphere. After cooling to room temperature, the mixture was poured into water and then extracted with chloroform. The combined organic phase was washed with brine and dried over MgSO<sub>4</sub>. The crude product was purified by column chromatography (ethyl acetate/n-hexane = 7/1). Yield: 45 % (1.7 g). T<sub>m</sub>=314 °C. <sup>1</sup>H NMR (300 MHz, CDCl<sub>3</sub>, δ): 7.93-7.90 (d, 4H), 7.60-7.58 (d, 4H), 7.55-7.52 (d, 8H), 7.37-7.29 (m, 16H), 7.22-7.19 (d, 4H), 7.13-7.08(t, 4H), 6.81-6.78 (d, 4H) ; <sup>13</sup>C NMR (500 MHz, CDCl<sub>3</sub>, δ):149.36, 149.29, 137.07, 136.08, 133.32, 130.41, 129.88, 129.79, 127.91, 125.45, 123.31, 122.71, 121.05. HR-Mass: C<sub>60</sub>H<sub>44</sub>N<sub>2</sub>O<sub>2</sub>SSi<sub>2</sub> calcd. 913.2540, found. 913.2747

### Purification

The obtained materials were purified by sublimation for device fabrication.

### Elemental Analysis data

| No | Sample_name | Type    | Weight[mg] | N           | C           | H           | S           |
|----|-------------|---------|------------|-------------|-------------|-------------|-------------|
|    | bypass      | By-Pass |            | 0           | 0           | 0           | 0           |
|    | blank       | Blank   |            | 0           | 0           | 0           | 0           |
|    | s1          | STD     | 1.296      | 6.539999962 | 72.58999634 | 6.059999943 | 7.429999828 |
|    | s2          | STD     | 1.036      | 6.539999962 | 72.58999634 | 6.059999943 | 7.429999828 |
|    | s3          | STD     | 1.662      | 6.539999962 | 72.58999634 | 6.059999943 | 7.429999828 |
|    | test        | UNK     | 1.302      | 6.52816391  | 72.10095215 | 6.029181957 | 7.282568932 |
| 1  | DTPPDDA     | Calcd   | -          | 7.64        | 83.57       | 4.91        | 0           |
| 1  | DTPPDDA     | UNK     | 0.73       | 7.545599937 | 83.14569092 | 4.816615582 | 0           |

| No | Sample_name | Type    | Weight[mg] | N           | C           | H           | S           |
|----|-------------|---------|------------|-------------|-------------|-------------|-------------|
|    | bypass      | By-Pass |            | 0           | 0           | 0           | 0           |
|    | blank       | Blank   |            | 0           | 0           | 0           | 0           |
|    | s1          | STD     | 1.296      | 6.539999962 | 72.58999634 | 6.059999943 | 7.429999828 |
|    | s2          | STD     | 1.036      | 6.539999962 | 72.58999634 | 6.059999943 | 7.429999828 |
|    | s3          | STD     | 1.662      | 6.539999962 | 72.58999634 | 6.059999943 | 7.429999828 |
|    | test        | UNK     | 1.302      | 6.52816391  | 72.10095215 | 6.029181957 | 7.282568932 |
| 1  | BDAPM       | Calcd   | -          | 3.20        | 83.52       | 5.01        | 0           |
| 1  | BDAPM       | UNK     | 0.75       | 3.208084106 | 83.00067139 | 4.843986511 | 0           |

| No | Sample name | Type    | Weight[mg] | N           | C           | H           | S           |
|----|-------------|---------|------------|-------------|-------------|-------------|-------------|
|    | bypass      | By-Pass |            | 0           | 0           | 0           | 0           |
|    | blank       | Blank   |            | 0           | 0           | 0           | 0           |
|    | s1          | STD     | 1.296      | 6.539999962 | 72.58999634 | 6.059999943 | 7.429999828 |
|    | s2          | STD     | 1.036      | 6.539999962 | 72.58999634 | 6.059999943 | 7.429999828 |
|    | s3          | STD     | 1.662      | 6.539999962 | 72.58999634 | 6.059999943 | 7.429999828 |
|    | test        | UNK     | 1.302      | 6.52816391  | 72.10095215 | 6.029181957 | 7.282568932 |
| 1  | SPDDA       | calcd   | -          | 3.06        | 78.83       | 4.81        | 3.50        |
| 1  | SPDDA       | UNK     | 0.959      | 3.044113874 | 78.21221924 | 4.683484554 | 3.399706125 |

### 3. TGA and DSC thermograms

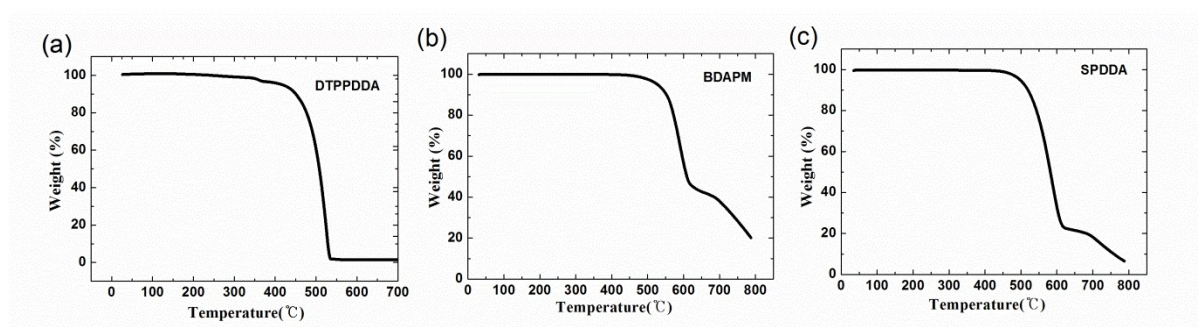

Figure S1. TGA data of (a) DTPPDDA, (b) BDAPM, and (c) SPDDA.

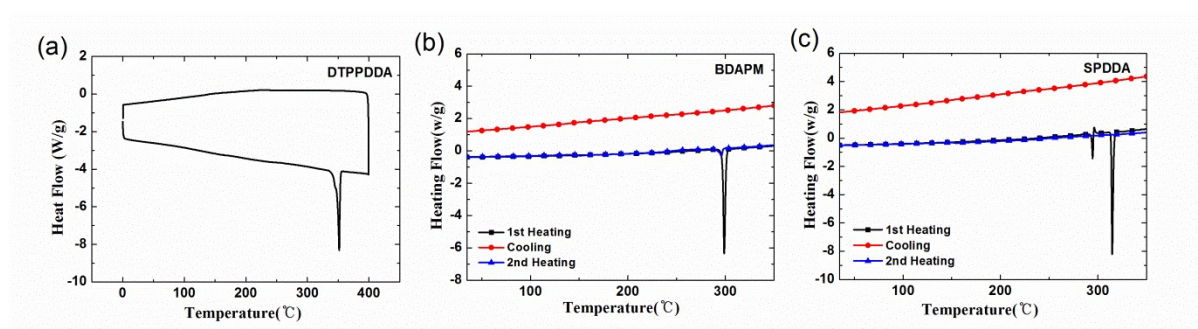

Figure S2. DSC data of (a) DTPPDDA, (b) BDAPM, and (c) SPDDA.

### 4. Cyclic voltammetry

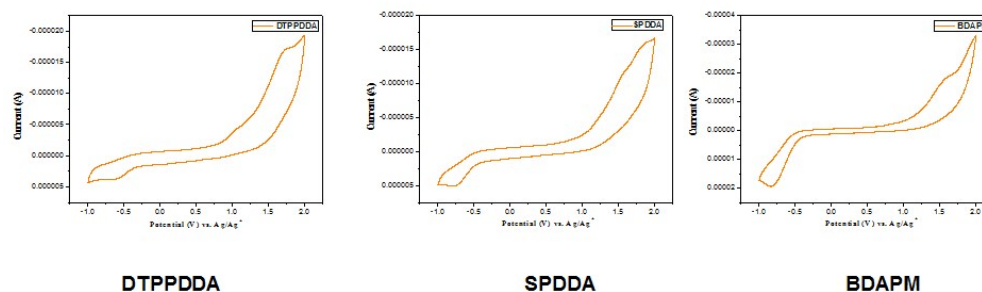

Figure S3. CV data of (a) DTPPDDA, (b) BDAPM, and (c) SPDDA

## 5. Max. EQEs of OLED devices in various doping ratio of the TADF emitters.

Table S4. Max. EQEs of OLED devices in various doping ratio of the TADF emitters.

| <b>Doping Ratio</b> | <b>Max. EQEs of the OLED devices of</b> |              |              |
|---------------------|-----------------------------------------|--------------|--------------|
|                     | <b>DTPPDDA</b>                          | <b>BDAPM</b> | <b>SPDDA</b> |
| <b>2 wt%</b>        | 3.4%                                    | 3.8%         | 2.3%         |
| <b>8 wt%</b>        | 4.7%                                    | 10.2%        | 1.7%         |
| <b>16 wt%</b>       | 3.2%                                    | 11.4%        | 1.1%         |

## 6. Calculation of theoretical EQE.

The EQE of an OLED can be expressed by the following equation,

$$\text{EQE} = \gamma \times \eta_{\text{S/T}} \times q_{\text{PL}} \times \eta_{\text{out}}$$

,where  $\gamma$  is the charge balance factor,  $\eta_{\text{S/T}}$  is the singlet-triplet factor,  $q_{\text{PL}}$  is the PL quantum yield, and  $\eta_{\text{out}}$  is the out-coupling efficiency of the emitted light. Derivation of  $q_{\text{PL}}$  and  $\eta_{\text{out}}$  are explained before. (assume  $\gamma=1$ )<sup>[1]</sup>

$\eta_{\text{S/T}}$  can be acquired from knowing prompt, delayed and total PLQYs, efficiency of RISC and internal quantum efficiency (IQE). Prompt, delayed and total PLQYs can be achievable from experiment and calculation method of IQE was previously reported.<sup>[2]</sup>

Table S5. PLQYs and RISC efficiencies of film samples of DTPPDDA, BDAPM and SPDDA doped into mCP:TSPO1, and IQE and  $\eta_{\text{S/T}}$  of the OLEDs.

| Values                                | DTPPDDA | BDAPM | SPDDA |
|---------------------------------------|---------|-------|-------|
| <b>PLQY (prompt)</b>                  | 35.6%   | 62%   | 18%   |
| <b>PLQY (delayed)</b>                 | 2.4%    | 8%    | 2%    |
| <b>PLQY (total)</b>                   | 38%     | 70%   | 20%   |
| <b>Efficiency of RISC</b>             | 3.8%    | 21%   | 2.4%  |
| <b>IQE</b>                            | 12.3%   | 33.3% | 6.8%  |
| <b><math>\eta_{\text{S/T}}</math></b> | 0.32    | 0.48  | 0.34  |

## 7. Singlet & triplet energy levels, Experimental and calculated singlet-triplet splittings and decay rates

Table S6. Singlet( $S_1$ ) & triplet( $T_1$ ) energy levels, Experimental and calculated singlet-triplet splittings( $\Delta E_{ST}$ ) and prompt( $\tau_p$ ) and delayed( $\tau_d$ ) decay rates.

| Name    | $S_1$<br>(eV) | $T_1$<br>(eV) | $\Delta E_{ST}$ (eV)<br>(Experimental) | $\Delta E_{ST}$ (eV)<br>(Calculated) | Decay time         |                               |
|---------|---------------|---------------|----------------------------------------|--------------------------------------|--------------------|-------------------------------|
|         |               |               |                                        |                                      | Prompt( $\tau_p$ ) | Delayed( $\tau_d$ )           |
| DTPPDDA | 2.79          | 2.75          | 0.04                                   | 0.01                                 | 6 ns               | 20 ns                         |
| BDAPM   | 2.7           | 2.64          | 0.06                                   | 0.01                                 | 134 ns             | 5,2 $\mu$ s,<br>42.96 $\mu$ s |
| SPDDA   | 3.0           | 2.93          | 0.07                                   | 0.02                                 | 4 ns               | 16 ns                         |



## 8. Oscillator strength

Table S7. Oscillator strength for the materials

|                                | <b>DTPDDA</b> | <b>BDAPM</b> | <b>SPDDA</b> |
|--------------------------------|---------------|--------------|--------------|
| <b>Oscillator strength (f)</b> | 0.0012        | 0.0004       | 0.0011       |

### Reference for Supporting Information

- 1 S. -Y. Kim, W. -I. Jeong, C. Mayr, Y. -S. Park, K. -H. Kim, J. -H. Lee, C. -K. Moon, W. Brütting, J. -J. Kim, *Adv. Funct. Mater.* 2013, **23**, 3896.
- 2 K. Masui, H. Nakanotani, C. Adachi, *Org. Elec.*, 2013, **14**, 2721.
